1 **Evaluation of the capacity of Paediatricians in Nigeria to conduct of research: A nationwide**  
2 **Survey.**

3 Authors' Affiliations: Maduka D. Ughasoro,<sup>1</sup> Iliya Jalo,<sup>2</sup> Angela Okolo,<sup>3</sup> Ebum Adejyugbe,<sup>4</sup>  
4 Mariya Murktah,<sup>5</sup> Austin Omogberare,<sup>6</sup> Ben Onankpa,<sup>7</sup> Ngozi Ibeziako,<sup>1</sup> Agozie Ubesie,<sup>1</sup> Damian  
5 Nwaneri,<sup>6</sup> Clement Ezechukwu<sup>8</sup>, Stephen Oguche.<sup>9</sup>

6 1. Department of Paediatrics, University of Nigeria Enugu Campus, Enugu State, Nigeria

7 2. Department of Paediatrics, Federal Medical Centre, Gombe, Gombe State.

8 3. Department of Paediatrics Federal Medical Centre, Asaba, Delta State, Nigeria

9 4. Department of Paediatrics, University of Lagos, Lagos State, Nigeria

10 5. Department of Paediatrics National Hospital Abuja, Nigeria

11 6. Department of Paediatrics, University of Benin, Benin City, Edo State, Nigeria.

12 7. Department of Paediatrics, Usmanu Dan Fodiyo University Teaching Hospital, Sokoto State,  
13 Nigeria

14 8. Department of Paediatrics, Nnamdi Azikiwe University, Awka, Anambra State, Nigeria

15 9. Department of Paediatrics, University of Jos, Plateau State, Nigeria

16 Corresponding Author: Maduka Donatus Ughasoro, Department of Paediatric, University of  
17 Nigeria Enugu Campus, Enugu, Nigeria. Email: [kakatitis@yahoo.co.uk](mailto:kakatitis@yahoo.co.uk) &  
18 [maduka.ughasoro@unn.edu.ng](mailto:maduka.ughasoro@unn.edu.ng); Phone: +2348060388863

19

20 **Abstract**

21 **Background**

22 Quality health care service delivery to children and adolescents is enhanced by continuous research  
23 into the health challenges of this subpopulation led by paediatricians with tremendous capacity to  
24 investigate and proffer solutions to the myriads of childhood illnesses. Understanding the health  
25 issues therefore is the foundation for implementation of viable interventions that assure optimum  
26 service delivery. In view of this background, the Paediatric Association of Nigeria (PAN) directed  
27 that research into children's health challenges in Nigeria should be brought to the front burner in  
28 the country. Pursuant to this laudable goal this study was conceived to evaluate the research  
29 capacity and capability of paediatricians in Nigeria and the institutions they represent. In view of  
30 above needs, this study aimed at evaluating the research capacities and challenges among  
31 paediatricians.

1 **Methods:** The survey used a cross-sectional nationwide design to enroll paediatricians into the  
2 study. The study was a combination of both online and face-to-face survey using questionnaire  
3 developed from Research Capacity Assessment Framework. Information on previous research  
4 work, challenges encountered, existing capacity and utilization of research outcome were obtained.  
5 The SPSS version 20 was used for data entry and analysis. For qualitative variables, similar  
6 responses were grouped under thematic heading.

7 **Results:** The response rates for online (via email survey, group-administered in a conference and  
8 individual face-to-face (at workshops) were 32 (3.2%), 75 (13.6%) and 15 (60%) respectively.  
9 The majority, 87(85.5%) of the participants had conducted prevalence studies, compared to 9  
10 (8.8%) that had done experimental studies. Those who have ever received grant funding for their  
11 studies were 21 (19.4%), while the proportion whose research outcome had informed policy update  
12 and practice were policy 20 (18.2%). More than 55% of the participants had challenges on some  
13 of the seven aspects of research: research topic, proposal, funding, fieldwork, analysis, utilizing  
14 findings and collaboration. Less than 40% of the participants had received training on some of the  
15 tested 14 research capacity areas except for the area of ethics where 78 (70.9%) reported having  
16 received training. For 51 (46.4%) this ethics training included the Good Clinical Practice  
17 Guidelines.

18 **Conclusion:** Nigerian Academic Paediatricians need to be stimulated to develop interest in  
19 research by building their presently low research capacity if future paediatric practice is to be  
20 driven significantly by evidence.

21

22 **Key words:** Clinical research; Paediatrician; Research Capacity; Policy-Practice Change

23

## 1 **Introduction**

2 It is the responsibility of paediatricians among other child advocates and stakeholders around the  
3 world to ensure optimal wellbeing of every child. This is to be achieved through their involvement  
4 in these five inter-related domains of practice: clinical service and consultancy, research,  
5 education/teaching, clinical leadership and clinical service planning and management.<sup>1</sup> The  
6 benefits to child healthcare service delivery can be improved if human resources are allocated  
7 effectively to cover all these domains. However, in reality, this does not appear to be the case.  
8 One domain that suffers the most is clinical research. The fact remains that the entire deliverables  
9 in paediatric care can be greatly enhanced if informed by evidence-based approaches.  
10 Paediatricians are exceptionally well positioned to lead in this effort because of both their  
11 specialization and positioning to utilize these evidenced-based clinical practice guidelines to  
12 improve child health care. This is possible if the health research is designed to address key clinical  
13 needs and resolve knowledge gaps in order to provide practical and implementable solutions.<sup>2</sup>  
14 Clinical research is fundamental in health care delivery system. When the research is carried out  
15 in a goal-oriented manner with clear view of expected outcome, is expected to propel continuous  
16 improvement in the disposition of healthcare workers to towards service delivery. Such efforts  
17 should be rewarded especially where the outcomes has significant impact on clinical practice by  
18 closing knowledge gaps.<sup>2</sup>

19 Although several studies have cited lack of support systems for research, increased clinical  
20 workload,<sup>3</sup> lack of funds, and the high premium placed on clinical service and consultancy as  
21 reasons for paucity of clinical research activities,<sup>4</sup> the extent of involvement of paediatricians in  
22 clinical research has not been well documented. Research into childhood illnesses and consequent  
23 publications abound in almost all aspects of specializations. However, what has not been fully  
24 executed is the development of prioritized research agenda for Nigeria. Agenda setting will focus

1 on critical child and adolescent health needs. This led the Paediatric Association of Nigeria (PAN)  
2 to inaugurate a Research Committee (PAN-RC) in April 2017 charged to strengthen and harmonize  
3 research activities among paediatricians, contribute and complement child health research efforts  
4 in the country and advance research knowledge and skills of its members. The committee  
5 embarked on a stepwise approach to develop a child and adolescent health research priority list for  
6 researchers and other stakeholders interested in finding solutions to childhood diseases in Nigeria.  
7 The first step in the process is a need assessment to determine the existing and spread of research  
8 capacities among paediatricians in Nigeria. Using a SWOT analysis (strength, weakness,  
9 opportunities and threat) approach based on the research capacity assessment framework the study  
10 aims to evaluate the paediatricians' clinical research engagements, challenges, and capacities to  
11 undertake meaningful research. This paper reports the preliminary findings on research capacities  
12 of paediatricians in a nationwide survey.

### 13 **Material and Methods**

#### 14 *The Setting:*

15 Paediatrics Association of Nigeria (PAN) is the umbrella association of all academic and practicing  
16 paediatricians in Nigeria with over 1000 members. Its members provide healthcare to children and  
17 adolescents in healthcare facilities all over the country including but not limited to training of  
18 undergraduate medical students and resident doctors in addition to providing consultancy services  
19 to national and international governmental and non-governmental organizations. The association  
20 aspires to see that child and adolescent health interventions are based on local evidence in addition  
21 to global observations.

22 *Study Design:* The study used a cross-sectional questionnaire based survey. A combination of both  
23 online and physical survey utilizing both quantitative and qualitative research methods was used.

## 1 **Development of Study Tool**

2 A review of available literature on assessment of research capacity of healthcare workers was  
3 conducted. The findings of the systemic review informed the development of the questionnaire.  
4 The survey questionnaire is based on the research capacity assessment scoring framework  
5 developed by Dana et al <sup>5</sup> designed to explore competence of researchers to conduct of clinical  
6 research. The survey questionnaire has some close and open ended fields about the age, gender,  
7 place of work, position in service (cadre), institutional affiliation, area of expertise, participation  
8 in a research work as principal investigator, the type of research work, what influenced the choice  
9 of research area/topic, challenges/barriers experienced conducting the research, if previous  
10 research findings had influenced evidence-based change in policy or practice, how the  
11 policy/practice change was achieved, if ever received grants, source of such grant, purpose for the  
12 grant and if aspects of health research pursued had received training,

## 13 **Online survey**

14 The paediatricians were invited by email using the Paediatric Association of Nigeria (PAN)  
15 mailing list to participate in the online survey.<sup>6</sup> The informed consent form was administered to  
16 study participants online inviting them to participate in the study. Online lasted over 6 weeks and  
17 there was weekly reminder. The participants who returned their completed consent forms  
18 accepting to be part of the survey received the survey questionnaire. Questionnaire distribution  
19 was extended to paediatricians practicing in the six geopolitical regions of the country, viz North  
20 West, North Central, North East, South West, South East and South-South regions.

## 21 **Structured interviews**

1 Paediatricians who attended Training of Trainers (TOT) workshop on Management of Severe  
2 Acute Malnutrition (SAM) in Asaba August 2017 and the annual Paediatric Association of Nigeria  
3 Conference (PANConf) in January 2018 where invited to participate in the survey. Those who had  
4 filled the online survey were excluded from participating at this level. The interview questionnaire  
5 was the same sequence as the online survey tool. The open ended questions enabled gathering in-  
6 depth information on what influenced the choice of research area/topic and how research translated  
7 to policy and practice. To avoid bias and influencing the responses given by the participants,  
8 interviewee-administered (self-administered) method was used instead of interviewer-  
9 administered method. A total of 25 questionnaires were distributed during the TOT on SAM  
10 workshop in Asaba and 15 questionnaires were returned completed. During the PANConf 2018, a  
11 total of 550 questionnaires were distributed, and 75 completed questionnaires were returned. To  
12 increase the number of completed questionnaires, additional distribution of survey questionnaires  
13 was conducted in the six geopolitical zones of the country through contact persons. This yielded  
14 17 more completed questionnaires. A total of 117 completed questionnaires were received. The  
15 scores for the level of challenges were categorized under even Likert scale of no challenge (0),  
16 low challenge (1), medium challenge (2.4) and high challenge (5 – 7). Their responses to the open  
17 ended questions: what influenced your choice of research area/topic and how policy change was  
18 achieved, were grouped under thematic headings.

### 19 **Ethical Consideration**

20 The Health Research Ethics Committee of University of Nigeria Teaching Hospital (UNTH)  
21 reviewed the research protocol and approved the study. Written informed consent was obtained  
22 from the participants before participating in the study.

### 23 **Data analysis**

1 The data was double entered into SPSS version 20 software. Frequencies were calculated for  
2 discrete variables, while means and standard deviation were calculated for continuous variables.  
3 The qualitative data was reviewed and categorized under thematic headings.

#### 4 **Results**

5 The Questionnaires retrieval rate for online, conference, and workshop were 32 (3.2%), 75 (13.6%)  
6 and 15 (60%). The extra 17 questionnaires were obtained from regional survey. A total of 117  
7 questionnaires were obtained, 7 incomplete questionnaires were excluded and 110 were finally  
8 analyzed (Figure1).

9

10 Figure 1: Flow chart of participants.

11

12 The demographic characteristics of study participants are shown in table 1. The participants  
13 included 40 (36.4%) males and 70 (63.6%) females. The mean age of participants was 44.8 years.  
14 Thirty (28.6%) of the participants representing the majority were general paediatricians (Figure  
15 2). Responses from the regions are shown in figure 3.

16 Table 1: Demographic characteristics of participants

| Variables                         | n = 110     | %     |
|-----------------------------------|-------------|-------|
| Gender                            |             |       |
| Female                            | 40          | 36.4% |
| Male                              | 70          | 63.6% |
| Age (Years)                       |             |       |
| Mean (SD)                         | 44.8 (7.45) |       |
| Range                             | 29 – 64     |       |
| Area of Sub-specialty (n = 105)** |             |       |
| General Paediatrics               | 30          | 28.6% |

|                          |    |       |
|--------------------------|----|-------|
| Neonatology              | 19 | 18.1% |
| Respirology              | 12 | 11.4% |
| Gastroenterology         | 9  | 8.6%  |
| Cardiology               | 6  | 5.7%  |
| Childhood Nutrition      | 5  | 4.8%  |
| Nephrology               | 5  | 4.8%  |
| Infectious Diseases      | 5  | 4.8%  |
| Neurology                | 4  | 3.8%  |
| Haematology/Oncology     | 4  | 3.8%  |
| Endocrinology            | 2  | 1.9%  |
| Children Emergency       | 1  | 1%    |
| Community Paediatrics    | 1  | 1%    |
| Locations (n= 101)       |    |       |
| SouthEast                | 35 | 34.7% |
| NorthWest                | 21 | 20.7% |
| NorthCentral/Middle Belt | 18 | 17.8% |
| SouthSouth               | 12 | 11.9% |
| SouthWest                | 11 | 10.9% |
| NorthEast                | 4  | 4%    |

1 \*\*: Some respondents gave more than one responses

2

3

4

5

6 Figure 2. Distribution of Participants according to sub-specialties

7

8 Figure 3: Distribution of participants according to their geo-locations

9

10 The number (%) of the participants that had acted as principal investigator in a research was 102  
 11 (92.7%). Most, 87 (85.5%), of their previous research works were prevalence studies. The least  
 12 frequent conducted research was randomized controlled clinical trial, representing 9 (8.8%). The  
 13 reasons for embarking on clinical research work included: to answer prevailing question/fill an  
 14 existing knowledge gap 42 (41.2%), found the research work interesting 41 (40.1%), and benefits  
 15 to patients/clinical observations 33 (32.4%). More uncommon reasons given included: suggestion  
 16 by funder/collaboration 2 (1.9%) and prompted by rare a condition 1 (0.9%). The majority (80.9%)



- 1 of paediatricians had not received grants/sponsorship to conduct research. Most of the outcomes  
 2 of their previous research works had not informed change in policy update or practice. See Table  
 3 2 for complete details.

4 Table 2: Scenario of current researches and outcomes

| Variables                                                          | n= 110 | %     |
|--------------------------------------------------------------------|--------|-------|
| Have you ever been a Principal Investigator (PI) in a research?    |        |       |
| Yes                                                                | 102    | 92.7% |
| No                                                                 | 0      | 0     |
| Missing response                                                   | 8      | 7.3%  |
| Which type of research were you the PI? (n=102)**                  |        |       |
| Prevalence Research                                                | 87     | 85.5% |
| Observational Research                                             | 20     | 19.6% |
| Operational Research                                               | 13     | 12.7% |
| Experimental (Randomized Clinical Trial)                           | 9      | 8.8%  |
| Others (Reviews)                                                   | 1      | 0.9%  |
| Determinants of research area (n=102)‡                             |        |       |
| Answer prevailing question/Existing Knowledge gap                  | 42     | 41.2% |
| Interest in the area/topic                                         | 41     | 40.1% |
| Benefit to patients/Clinical Observation                           | 33     | 32.4% |
| Feasibility of conducting the research                             | 24     | 23.5% |
| Availability of fund                                               | 17     | 16.7% |
| Disease burden (mortality/morbidity)                               | 13     | 12.7% |
| Needs assessment                                                   | 11     | 10.8% |
| Dissertation/Academic appraisal                                    | 9      | 8.8%  |
| Suggested by funder/Collaboration                                  | 2      | 1.9%  |
| Rare condition                                                     | 1      | 0.9%  |
| Have you ever received grants to conduct a research (n=108)        |        |       |
| Yes                                                                | 21     | 19.4% |
| No                                                                 | 87     | 80.6% |
| Had any of your previous research informed policy change (n = 110) |        |       |
| Yes                                                                | 20     | 18.2% |
| No                                                                 | 90     | 91.8% |
| How did you think the policy change was achieved (n = 14)          |        |       |
| Notified Hospital Management                                       | 3      | 21.4% |
| Collaborated with policy makers                                    | 3      | 21.4% |
| The findings is cited globally/Published                           | 2      | 14.3% |
| Included in the management protocol                                | 2      | 14.3% |
| Intervention Programme                                             | 1      | 7.15% |
| Personal implementation                                            | 1      | 7.15% |

|                                                 |   |       |
|-------------------------------------------------|---|-------|
| Liaised with WHO                                | 1 | 7.15% |
| Interaction and notification of relevant bodies | 1 | 7.15% |

1 \*\*: Some respondents were PI in more than one type of research. ‡ Some respondents gave more  
2 than one reasons for embarking on a research;

3

4 The list of challenges in descending order starting with the most challenging were getting sponsor  
5 86 (78.2%), developing research proposal 80 (72.7%), and choosing research areas/topic 79  
6 (71.8%) (Table3).

7

8 Table 3: Challenges in conduct of research

| Variables                       | No challenge<br>n (%) | Challengin<br>g (%) | Average<br>rating where<br>1 is the least<br>and 7 highest | 1<br>(Low<br>challenge) | 2 - 4<br>Medium<br>challenge) | 5 - 7<br>High<br>Challenge) |
|---------------------------------|-----------------------|---------------------|------------------------------------------------------------|-------------------------|-------------------------------|-----------------------------|
| Choosing Research Area/Topic    | 31 (28.2)             | 79 (71.8)           | 2.26 (7 <sup>th</sup> )                                    | 34                      | 36                            | 9                           |
| Developing Research Proposal    | 30 (27.3)             | 80 (72.7)           | 2.60 (5 <sup>th</sup> )                                    | 22                      | 50                            | 8                           |
| Getting Sponsor/Fund            | 24 (21.8)             | 86 (78.2)           | 4.24 (1 <sup>st</sup> )                                    | 26                      | 25                            | 35                          |
| Coordinating Field Work         | 38 (34.5)             | 72 (65.5)           | 2.81 (3 <sup>rd</sup> )                                    | 19                      | 41                            | 12                          |
| Analysis                        | 34 (32.7)             | 74 (67.3)           | 2.65 (4 <sup>th</sup> )                                    | 15                      | 49                            | 8                           |
| Publishing of research findings | 50 (45.5)             | 60 (54.5)           | 3.43 (2 <sup>nd</sup> )                                    | 13                      | 34                            | 14                          |
| Getting collaborators           | 52 (47.3)             | 58 (52.7)           | 2.38 (6 <sup>th</sup> )                                    | 26                      | 20                            | 12                          |
| Others (n= 9)                   |                       |                     |                                                            |                         |                               |                             |
| Default of subjects (n=3)       |                       |                     |                                                            |                         |                               |                             |
| Parents/caregivers (n=3)        |                       |                     |                                                            |                         |                               |                             |
| Time management (n=2)           |                       |                     |                                                            |                         |                               |                             |
| Retirement of Grants (n= 1)     |                       |                     |                                                            |                         |                               |                             |

9

10

11 Figure 4: Level of challenges experienced in different components of research

12

1 To determine area that will require capacity development, respondents were asked to enlist  
2 research related trainings they had received. The least received trainings were data quality  
3 assurance (7.3%), and team science (8.2%) (Table 4).

4  
5 Table 4: Aspects of Research the respondents had received training

| Aspect received training        | N  | %    |
|---------------------------------|----|------|
| Research Ethics                 | 78 | 70.9 |
| Good Clinical Practice          | 51 | 46.4 |
| Good Laboratory Practice        | 17 | 15.5 |
| Responsible Conduct of Research | 40 | 36.4 |
| Crises Communication            | 11 | 10   |
| Grant Writing                   | 29 | 26.4 |
| Manuscript Development          | 39 | 35.5 |
| Biostatistics                   | 38 | 34.5 |
| Data Management                 | 35 | 31.8 |
| Data Quality Assurance          | 8  | 7.3  |
| Research Monitoring             | 12 | 10.9 |
| Monitoring and Evaluation       | 22 | 20   |
| Budgeting                       | 13 | 11.8 |
| Team Sciences                   | 9  | 8.2  |

6 **Discussion**

7 The majority of the research works carried out by paediatricians were prevalence studies. Although  
8 the challenges of conducting experimental studies involving children are obvious, the issues of  
9 funding and consenting process are outstanding. Clinical trials involving children are more  
10 challenging to carry out due to lack of funding, unique nature of children and ethical concerns.  
11 However current regulations and initiatives are improving the scope, quantity and quality of trials  
12 in children.<sup>7</sup> Generous funding will dramatically increase the number of paediatricians  
13 participating in clinical experimental research. Presently, there are few experimental drug studies  
14 that involved children compared to adults.<sup>8-10</sup> Part of the low level of involvement of children in  
15 research can be blamed on the existing guidelines which allow children to participate in  
16 experimental research only when their parents/caregivers give their consent. It is not surprising  
17 that only three participants in the study mentioned availability of subjects and issue of consent as

1 challenges. The study shows low capacity of respondents to conduct high quality and more  
2 complex research. The situation may change when capacity is improved and more experimental  
3 research is conducted among paediatric subjects in Nigeria.<sup>11</sup>

4 The Belmont Report justifies inclusion of children in research.<sup>12, 13</sup> Interestingly among the tested  
5 capacity areas of research, research ethics and Good Clinical Practice (GCP) were the two  
6 instructional activities for which more paediatricians had received training. These trainings place  
7 paediatricians at vintage position to lead or be part of experimental study involving children.

8 The reported high prevalence of lack of access to grants is a disturbing factor to be urgently  
9 addressed failure of which will militate against conduct of high quality research targeted at  
10 improving the health children and adolescents in Nigeria. In accordance with the Convention on  
11 the Rights of the Child,<sup>14</sup> children have right to the highest attainable level of health care. This  
12 cannot be realized if children are not provided with health care based on proven evidence. Such  
13 evidence cannot be generated through extrapolation of researches outcomes in adults.<sup>15-19</sup> The  
14 importance of this is highlighted by our finding that paediatricians were engaged in low quality  
15 research that does not feed into policy updates.

16 Evidence have shown that the expected outcome of any research work is to generate evidence that  
17 will change policy and practice.<sup>20-23</sup> Unfortunately this study revealed that most of the studies  
18 carried out by paediatricians have not fulfilled this role. It appears that previous research efforts  
19 were not targeted at needs of children and adolescent. The driving force for research in the Nigeria  
20 includes academic pursuit and promotion for the academic paediatricians. The country must now  
21 move on to tailor research to the needs of children and adolescents. The real needs of children and  
22 adolescents have to be clearly identified and targeted by research. This way paediatricians will be  
23 exposed to the concept of targeted research for evidence that will inform policy improvement and

1 practice (GRIPP).<sup>24</sup> To achieve this goal there are basically two broad strategies to be employed:  
2 engaging the stakeholders is one and using evidence in decision making is the another.<sup>21</sup> The sole  
3 goal of GRIPP is to achieve knowledge translation, knowledge transfer, knowledge exchange,  
4 research utilization, implementation, diffusion, and dissemination.<sup>25</sup> The translation of research  
5 findings into actionable policy and programmatic guidance is an achievable goal to be exploited.

6 The study has shown that there is lack of strategic research capacity building in the country. It has  
7 always remained a point of argument; can clinicians be effective researchers? Beyond an obvious  
8 yes, a conscious and adequate capacity development is urgently needed. The capacity development  
9 should be ongoing through an organized structure that will enable and support programmes that  
10 will provide paediatricians irrespective of geographical place and areas of work with opportunities  
11 to interact and grow in their ability to plan and conduct clinical research. There are multiple means  
12 towards achieving this research capacity development. Strengthening formal education and routine  
13 training programme during the residency and creating internship for research skill acquisition and  
14 mentoring are key ways to attain optimum standards. <sup>26</sup> Building research capacity is very  
15 important. When research capacity is limited, as revealed in this study, there is a gap in the  
16 production of contextually relevant research evidence for communal benefits and in the synthesis  
17 of research evidence to inform practice, programmes and policies.

18 Lack of funding showed up strongly as a rate limiting step to conduct research by the respondents.  
19 The research component of the residency programme in Nigeria is poorly funded. There is also  
20 limited national funding arrangement for academic paediatricians to compete for. In order to  
21 respond to these concerns, capacity building programmes should receive high priority in health  
22 budgets. This can be in the form of career trajectories; institutional infrastructure and mentorship

1 for research; tailoring research capacity efforts to a broad range of clinical and consultation  
2 services, scholarship and the involvement of community and policy makers in the process.<sup>27</sup>

3 This study revealed low questionnaire retrieval rate from respondents in an internet-based  
4 methodology and conference survey compared to individualized questionnaire administration  
5 survey. Similar low response rate from research participants have been previously reported <sup>28,29</sup>  
6 Doctors are very busy, they give most of their time to patient care. The internet based survey ought  
7 to be easier, fast, lower cost, ability to accumulate very large volume of interviews in a short space  
8 of time and no interviewer effects. Despite these advantages, online survey is not optimized in  
9 research among the populations studied. Perhaps the study participants would have been  
10 encouraged to utilize online survey through creating awareness during conferences and use of  
11 incentives like winning phone credit or some megabits at the completion of the survey. Such  
12 incentivized method was demonstrated in a survey where at the completion of a survey,  
13 participants were entered into lottery for which they stood a chance to win cinema tickets. <sup>30</sup>

14 Conclusion: This survey has revealed areas of gap amongst Paediatricians. The Nigerian Academic  
15 Paediatricians need to be stimulated to develop interest in research by building their presently low  
16 research capacity if the future paediatric practice is to be driven significantly by evidence.  
17 Paediatricians in Nigeria should be re-orientated to aggressively contribute to evidence-based  
18 practice by seeking to build their own capacity for high quality research and to demand strong  
19 support for research into children and adolescents' health concerns in Nigeria. This will pave the  
20 way for programing of priority intervention for capacity building.

## 21 **References**

22 1. NSW Health, Clinical Nurse Consultants- Domains and Functions. Department of Health North  
23 Sydney, Australia, 2005

- 1 2. Australian Government Department of Health and Ageing. Strategic Review of Health and  
2 Medical Research Final Report. Canberra: Commonwealth of Australia; 2013.)\*
- 3 3. Wilkes Lesley, Cummings Joanne, McKay Nicola. Developing a culture to facilitate research  
4 capacity building for clinical nurse consultants in generalist paediatric practice. Nursing  
5 research and Practice; 2013 <http://dx.doi.org/10.1155/2013/709025>)
- 6 4. K. Vaughan, L.M. Wilkes, J. O’Baugh, and R. O’Donohue, “The role and scope of the clinical  
7 nurse consultant in Wentworth area health service: a qualitative study,”  
8 Collegian.2005;12(3):14-19
- 9 5. Dana Burde, Joel Middleton, Cyrus Samii. Research Capacity Assessment Scoring Framework,  
10 2016, available <https://www.alseproject.com>
- 11 6. Survey Methods. [www.surveymethods.com](http://www.surveymethods.com). Accessed on 4<sup>th</sup> May 2018
- 12 7. P.D. Joseph, J.C. Craig, P.HY Caldwell. Clinical trials in children. BJCP 2015;79(3):357-369
- 13 8. Conroy S, Choonara I, Impicciatore P, et al. Survey of unlicensed and off label drug use in  
14 paediatric wards in European countries. BMJ 2000;320:79–82.
- 15 9. Choonara I. Clinical trials of medicines in children. BMJ 2000;321:1093–4.
- 16 10. Smyth RL. Research with children. BMJ 2001;322:1377–8.
- 17 11. D.S. Wendler Assent in paediatric research: theoretical and practical considerations. J Med  
18 Ethics 2006;32:229-234. Doi: 10.1136/jme.2004.011114
- 19 12. The National Commission for the Protection of the Human Subjects of Biomedical and  
20 Behavioral Research. The Belmont Report: Ethical Principles and Guidelines for Protection of  
21 Human Subjects of Research. HHS.gov. US Department of Health and Human  
22 Services. [Accessed on 2018 May 5]. Available  
23 from:<http://www.hhs.gov/ohrp/humansubjects/guidance/belmont.html>
- 24 13. S. B. Bavdekar. Pediatric clinical Trials. Perspect Clin res 2013;4(1):89-99.
- 25 14. General Assembly of the United Nations. Convention on the Rights of the Child, 20 November  
26 1989. [Last accessed on 2018 April 19]. Available from: <http://www.unicef.org/crc/crc.htm>
- 27 15. Bavdekar SB, Sadawarte PA, Gogtay NJ, Jain SS, Jadhav S. Off-label drug use in a Pediatric  
28 Intensive Care Unit. Indian J Pediatr. 2009;76:1113–8
- 29 16. Jain SS, Bavdekar SB, Gogtay NJ, Sadawarte PA. Off-label drug use in children. Indian J  
30 Pediatr. 2008;75:1133–6.
- 31 17. Williams K, Thomson D, Seto I, Contopoulos-Ioannidis DG, Ioannidis JP, Curtis S, et al.  
32 Standard 6: Age Groups for Pediatric Trials. Pediatrics. 2012;129:S153–60

- 1 18. Dunne J, Rodriguez WJ, Murphy MD, Beasley BN, Burckart GJ, Filie JD, et al. Extrapolation  
2 of adult data and other data in pediatric drug-development  
3 programs. *Pediatrics*. 2011;128:e1242–9.
- 4 19. Gill D, Kurz R. Practical and Ethical Issues in Pediatric Clinical Trials. *Appl Clin*  
5 *Trials*. 2003;12:41–4
- 6 20. Lavis JN, Oxman AD, Lewin S, Fretheim A. SUPPORT Tools for evidenceinformed health  
7 Policymaking (STP) 3: setting priorities for supporting evidence informed policymaking.  
8 *Health Res Policy Syst*. 2009;7:S3.
- 9 21. Mirzoev T, Green A, Gerein N, Pearson S, Bird P, Ha BT, Ramani K, Qian X, Yang X,  
10 Mukhopadhyay M, Soors W. Role of evidence in maternal health policy processes in Vietnam,  
11 India and China: findings from the HEPVIC project. *Evid Policy*. 2013;9:493–511.
- 12 22. Alliance for Health Policy and Systems Research. Strengthening health systems: the role and  
13 promise of policy and systems research. Geneva: WHO, Alliance for Health Policy and  
14 Systems Research; 2004.
- 15 23. Green A, Bennett S. Sound Choices: Enhancing Capacity for EvidenceInformed Health Policy.  
16 AHPSR Biennial Review. Geneva: WHO, Alliance for Health Policy and Systems Research;  
17 2007
- 18 24. B. Uzochukwu, O.Onwujekwe, C. Mbachu, E.Etiaba, M.E. Nystrom, L. Gilson. The challenge  
19 of bridging the gap between researchers and policy makers: experiences of a Health Policy  
20 Research Group in engaging policy makers to support evidence informed policy making in  
21 Nigeria. *Globalization and Health* 2016;12:67.doi.10.1186/s12992-016-0209-1
- 22 25. Oxman AD, Lavis JN, Lewin S, Fretheim A. SUPPORT Tools for evidence-informed health  
23 Policymaking (STP) 1: What is evidence-informed policymaking? *Health Res Policy Syst*.  
24 2009;7 Suppl 1:S1. doi:10.1186/1478-4505-7-S1-S1.
- 25 26. M.Murray, *Beyond the myths and magic of mentoring: How to facilitate an effective mentoring*  
26 *process*, Jossey-Bass, San Francisco, Calif, USA, 2001
- 27 27. N. Edwards, D. Kaseje, E. Kahwa. In *Building and Evaluating research capacity in Heathcare*  
28 *System: Case Studies and Innovative Models*. Eds N. Edwards, D. Kaseje, E. Kahwa, UCT  
29 *Pub* 2016  
30
- 31 28. B. Duffy, K. Smith, G. Terhanian, J. Bremer. Comparing data from online and face-to-face  
32 surveys. *International Journal of Market Research* 2005;47(6):615-639 )
- 33 29. G. Szolnoki, D. Hoffmann. Online, face-to-face and telephone surveys – comparing different  
34 sampling methods in wine consumer research. *Wine Economis and Policy* 2013;2(2):57-66)
- 35 30. Marie L Misso, dragan Ilic, Terry P Haines, Alison M Hutchinson, Christine E East, Helena J  
36 Teede. Development, implementation and evaluation of a clinical research engagement and



1 leadership capacity building program in a large Australian healthcare service. BMC Medical  
2 Education 2016;16:133 doi 10.1186/s12909-016-0525-4)

3

4

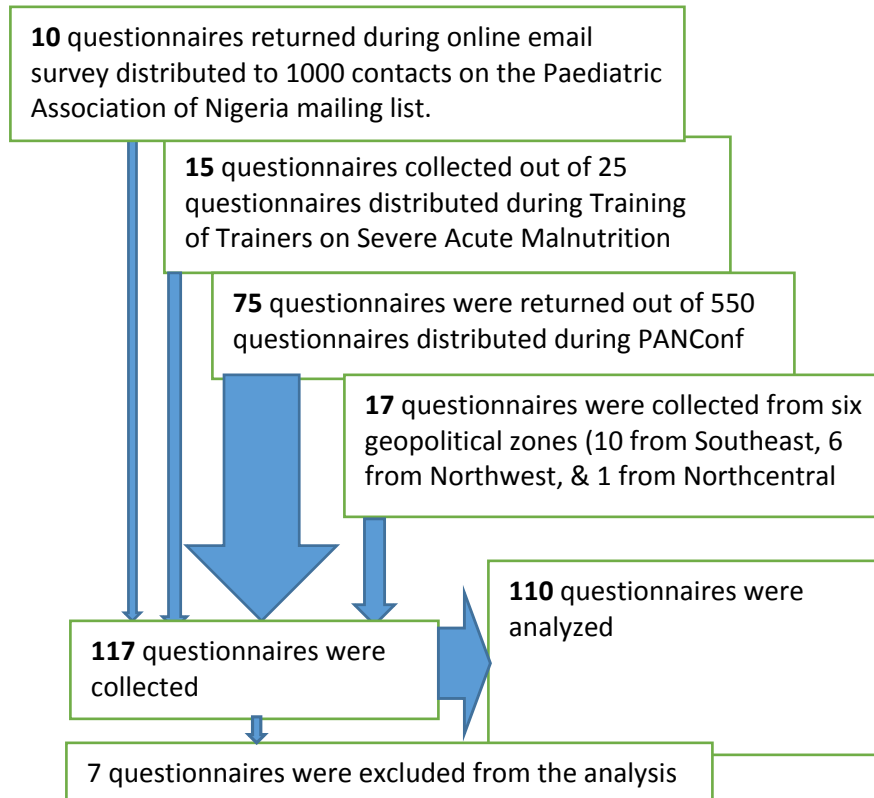

Figure 1: Flow chart of participants.

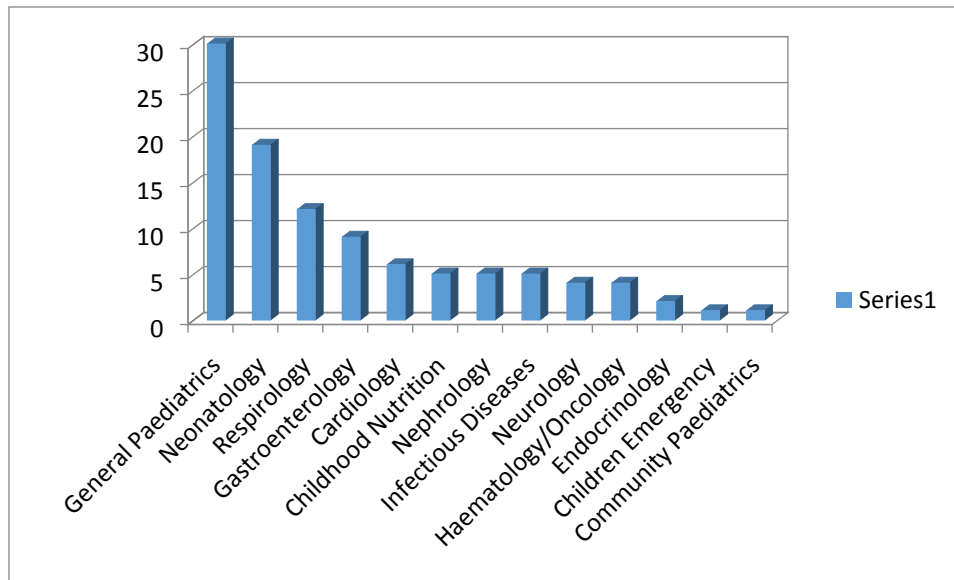

Figure 2. Distribution of Participants according to sub-specialties

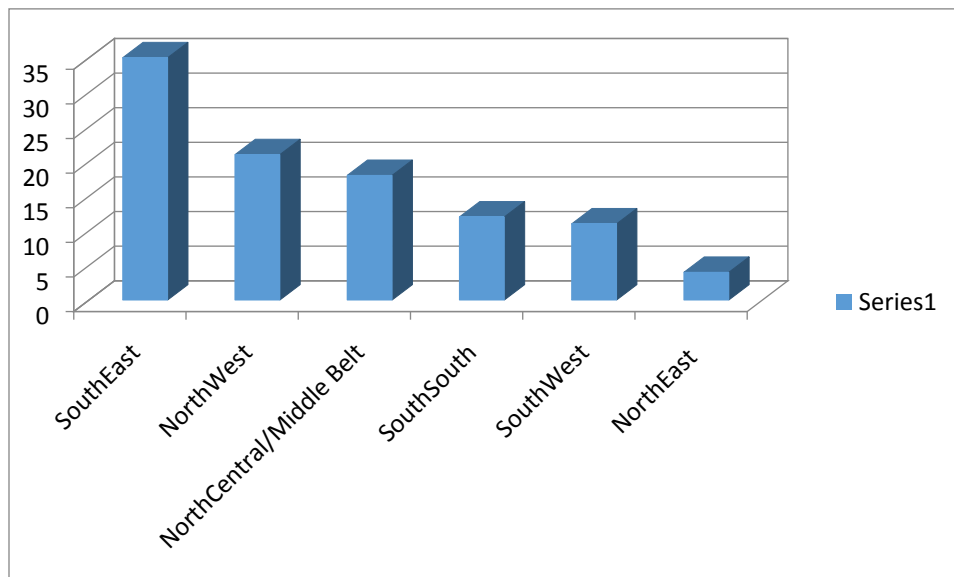

Figure 3: Distribution of participants according to their geo-locations

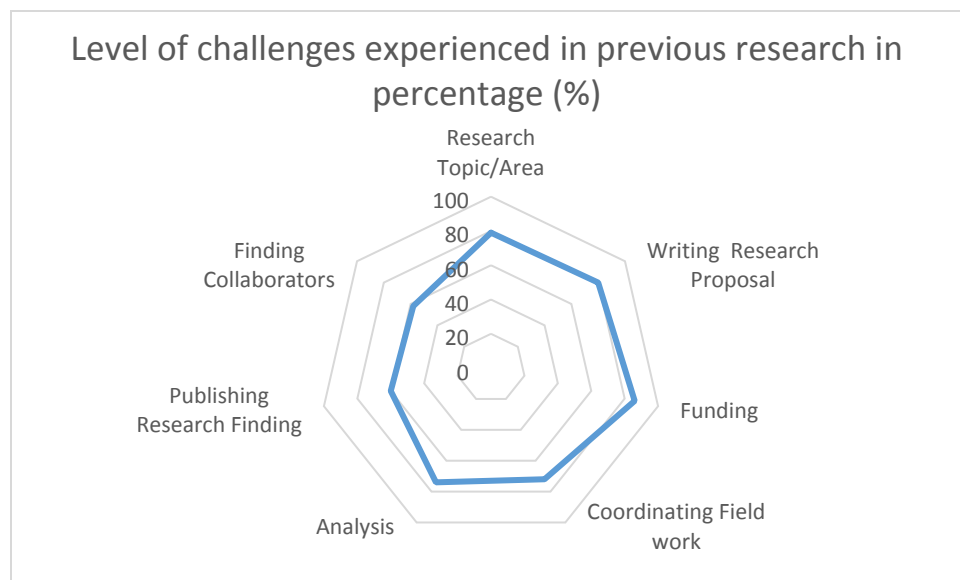

Figure 4: Level of challenges experienced in different components of research
